# Supplementary material
Source: publisher figshare collection journal article supplement (https://springernature.figshare.com/ndownloader/files/23204762)
Supplement: Supplementary file 1 [file 23204762]

Measurement(s),plant morphology trait • tree mortality • fire • tree fire injury • wildfire
Technology Type(s),digital curation
Factor Type(s),year of data collection • geographic location of fire • tree fire injury
Sample Characteristic - Organism,trees
Sample Characteristic - Environment,forest ecosystem
Sample Characteristic - Location,Cascades Region • Blue Mountains • Far Northern Rockies • Sierra Nevada • Piedmont Province • Region of Piedmont • Atlantic and Gulf Coastal Plain Floristic Province • Northern Rocky Mountains Provincial Park
